# Supplementary material for: A promising detection candidate for flagellated Salmonella spp
Source: PubMed Central journal article supplement (PMC6694378; doi:10.1186/s13568-019-0851-0), 2019-08-14
Supplement: 13568_2019_851_MOESM1_ESM.pdf [file 13568_2019_851_MOESM1_ESM.pdf]

**A Promising Detection Candidate for Flagellated Salmonella spp.**

Yi Yang<sup>1,2,5§</sup>, Jiangying Zhang<sup>1,2,5§</sup>, Chunhong Zhu<sup>3</sup>, Xia Meng<sup>1,2,5</sup>, Shuhong Sun<sup>4\*</sup>,  
Guoqiang Zhu<sup>1,2,5\*</sup>

1. College of Veterinary Medicine, Yangzhou University, Yangzhou, China
2. Jiangsu Co-Innovation Center for Important Animal Infectious Diseases and Zoonoses, Yangzhou, China
3. Jiangsu Institute of Poultry Science, Yangzhou, China
4. College of Animal Science and Technology, Shandong Agricultural University, Tai'an, Shandong, China
5. Joint International Research Laboratory of Agriculture and Agri-Product Safety of Ministry of Education of China, Yangzhou University, Yangzhou, China

**Corresponding author 1**

**Guoqiang Zhu, PhD**

E-mail: [yzgqzhu@yzu.edu.cn](mailto:yzgqzhu@yzu.edu.cn).

Tel: (0086)-514-87972590

Fax: (0086)-514-87311374

**Corresponding author 2**

**Shuhong Sun, PhD**

E-mail: [ssh6811@163.com](mailto:ssh6811@163.com)

Tel: (0086)-13705389710

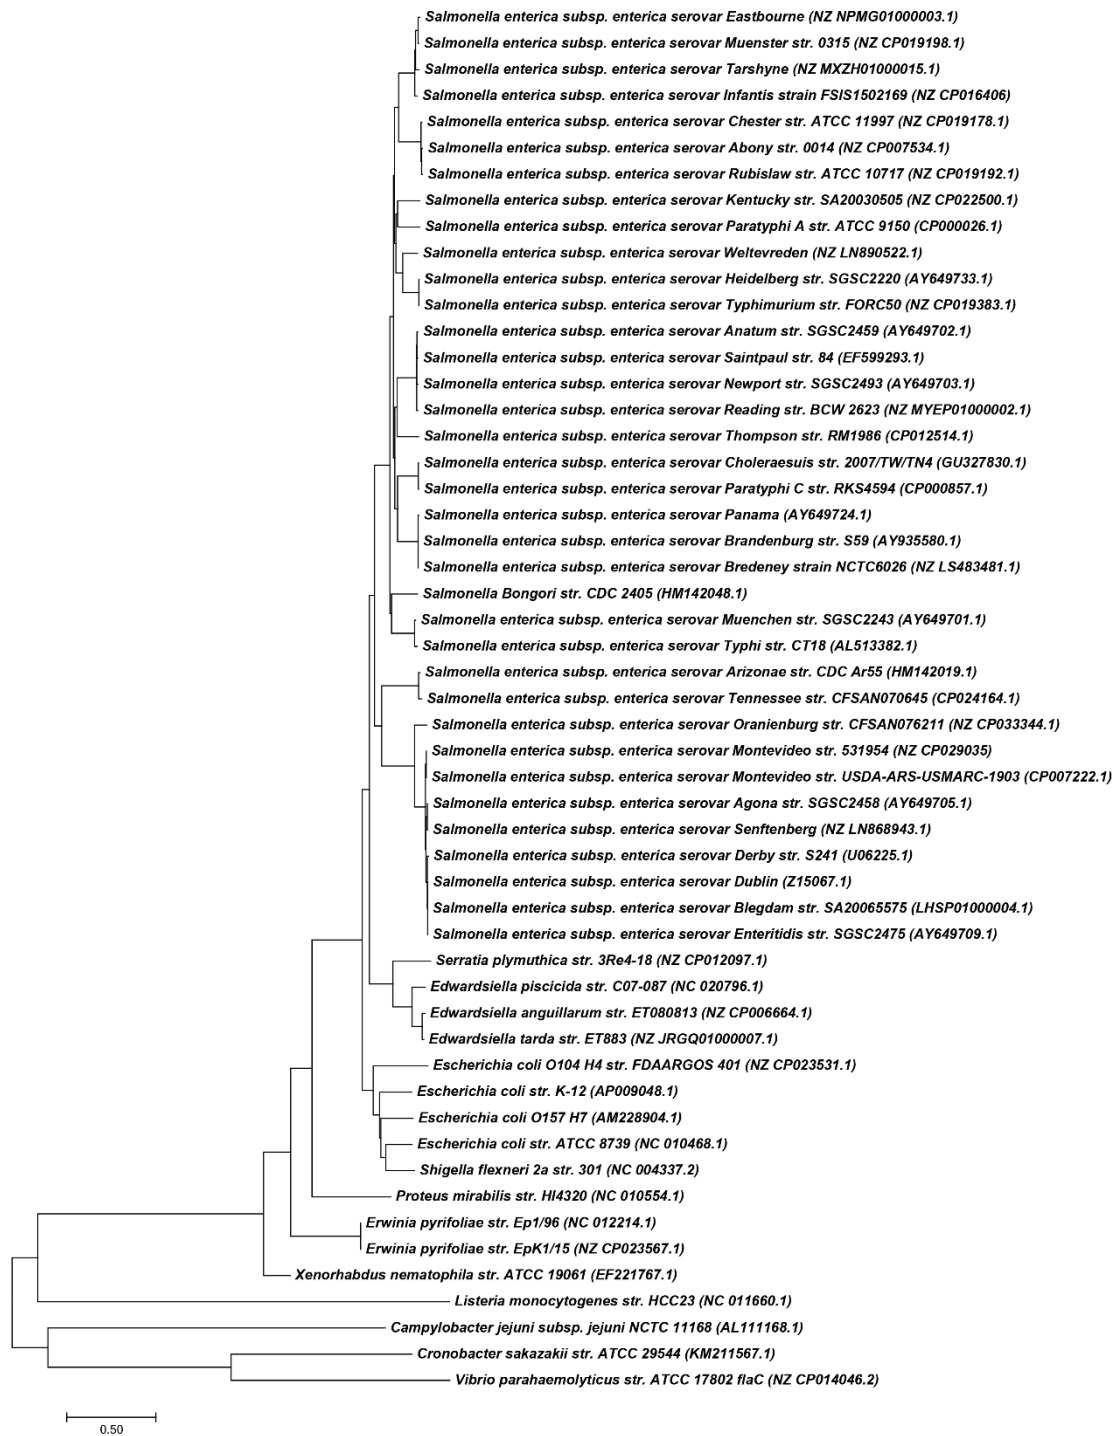

**Fig. S1** Phylogenetic analysis based on predicted amino acid sequences of FliC.

The evolutionary distances were computed using the Maximum Composite Likelihood method in MEGA7 (version 7. 0. 26). The analysis involved 53 nucleotide sequences (36 *Salmonella* and 17 non-*Salmonella*). The phylogenetic tree showed that sequences of *fliC* within *Salmonella* species had close genetic relationship.

s. Typhimurium\_str. FORC50  
s. Newport\_str. SGC2493  
s. Heidelberg\_str. SGC2220  
s. Choleraesuis\_str. 2007/PW/TN4  
s. Arizonae\_str. CDC\_Ar55  
s. Saintpaul\_str. 84  
s. Paratyphi\_A\_str. ATCC\_9150  
s. Brandenburg\_str. S59  
s. Reading\_str. BCM\_2623  
s. Typhi\_str. CT18  
s. Thompson\_str. RM1986  
s. Anatum\_str. SGC2459  
s. Muenchen\_str. SGC2243  
s. Abony\_str. 0014  
s. Chester\_str. ATCC\_11997  
s. Eastbourne  
s. Paratyphi\_C\_str. RK84594  
s. Tarshyne  
s. Panama  
s. Dublin  
s. Enteritidis\_str. SGC2475  
s. Agona\_str. SGC2458  
s. Derby\_str. S241  
s. Montevideo\_str. USDA-ARG-USMARC-1903  
s. Blegdam\_str. SA2006575  
s. Bredeneey\_strain NCTC6026  
s. Muenster\_str. 0315  
s. Senftenberg  
s. Tennessee\_str. CFSA070645  
s. Weltevreden  
s. Rubislaw\_str. ATCC\_10717  
s. Oranienburg\_str. CFSA076211  
s. Montevideo\_str. 531954  
s. Kentucky\_str. SA20030505  
s. Infantis\_strain FS181502169  
s. Bongori\_str. CDC\_2405

s. Typhimurium\_str. FORC50  
s. Newport\_str. SGC2493  
s. Heidelberg\_str. SGC2220  
s. Choleraesuis\_str. 2007/PW/TN4  
s. Arizonae\_str. CDC\_Ar55  
s. Saintpaul\_str. 84  
s. Paratyphi\_A\_str. ATCC\_9150  
s. Thompson\_str. RM1986  
s. Anatum\_str. SGC2459  
s. Muenchen\_str. SGC2243  
s. Abony\_str. 0014  
s. Chester\_str. ATCC\_11997  
s. Eastbourne  
s. Paratyphi\_C\_str. RK84594  
s. Tarshyne  
s. Panama  
s. Dublin  
s. Enteritidis\_str. SGC2475  
s. Agona\_str. SGC2458  
s. Derby\_str. S241  
s. Montevideo\_str. USDA-ARG-USMARC-1903  
s. Blegdam\_str. SA2006575  
s. Bredeneey\_strain NCTC6026  
s. Muenster\_str. 0315  
s. Senftenberg  
s. Tennessee\_str. CFSA070645  
s. Weltevreden  
s. Rubislaw\_str. ATCC\_10717  
s. Oranienburg\_str. CFSA076211  
s. Montevideo\_str. 531954  
s. Kentucky\_str. SA20030505  
s. Infantis\_strain FS181502169  
s. Bongori\_str. CDC\_2405

s. Typhimurium\_str. FORC50  
s. Newport\_str. SGC2493  
s. Heidelberg\_str. SGC2220  
s. Choleraesuis\_str. 2007/PW/TN4  
s. Arizonae\_str. CDC\_Ar55  
s. Saintpaul\_str. 84  
s. Paratyphi\_A\_str. ATCC\_9150  
s. Brandenburg\_str. S59  
s. Reading\_str. BCM\_2623  
s. Typhi\_str. CT18  
s. Thompson\_str. RM1986  
s. Anatum\_str. SGC2459  
s. Muenchen\_str. SGC2243  
s. Abony\_str. 0014  
s. Chester\_str. ATCC\_11997  
s. Eastbourne  
s. Paratyphi\_C\_str. RK84594  
s. Tarshyne  
s. Panama  
s. Dublin  
s. Enteritidis\_str. SGC2475  
s. Agona\_str. SGC2458  
s. Derby\_str. S241  
s. Montevideo\_str. USDA-ARG-USMARC-1903  
s. Blegdam\_str. SA2006575  
s. Bredeneey\_strain NCTC6026  
s. Muenster\_str. 0315  
s. Senftenberg  
s. Tennessee\_str. CFSA070645  
s. Weltevreden  
s. Rubislaw\_str. ATCC\_10717  
s. Oranienburg\_str. CFSA076211  
s. Montevideo\_str. 531954  
s. Kentucky\_str. SA20030505  
s. Infantis\_strain FS181502169  
s. Bongori\_str. CDC\_2405

s. Typhimurium\_str. FORC50  
s. Newport\_str. SGC2493  
s. Heidelberg\_str. SGC2220  
s. Choleraesuis\_str. 2007/PW/TN4  
s. Arizonae\_str. CDC\_Ar55  
s. Saintpaul\_str. 84  
s. Paratyphi\_A\_str. ATCC\_9150  
s. Brandenburg\_str. S59  
s. Reading\_str. BCM\_2623  
s. Typhi\_str. CT18  
s. Thompson\_str. RM1986  
s. Anatum\_str. SGC2459  
s. Muenchen\_str. SGC2243  
s. Abony\_str. 0014  
s. Chester\_str. ATCC\_11997  
s. Eastbourne  
s. Paratyphi\_C\_str. RK84594  
s. Tarshyne  
s. Panama  
s. Dublin  
s. Enteritidis\_str. SGC2475  
s. Agona\_str. SGC2458  
s. Derby\_str. S241  
s. Montevideo\_str. USDA-ARG-USMARC-1903  
s. Blegdam\_str. SA2006575  
s. Bredeneey\_strain NCTC6026  
s. Muenster\_str. 0315  
s. Senftenberg  
s. Tennessee\_str. CFSA070645  
s. Weltevreden  
s. Rubislaw\_str. ATCC\_10717  
s. Oranienburg\_str. CFSA076211  
s. Montevideo\_str. 531954  
s. Kentucky\_str. SA20030505  
s. Infantis\_strain FS181502169  
s. Bongori\_str. CDC\_2405

**Fig. S2 Similarity analysis of the amino acid sequence of FliC from different serotype of *Salmonella* strains.**

The amino acid sequences were aligned by the Clustal W method using the MegAlign of DNASTAR (version 7.1.0). Sites with pink background color represent the conservative region, and sites without background color represent the variable region.
